# Supplementary material for: TMEM8C-mediated fusion is regionalized and regulated by NOTCH signalling during foetal myogenesis
Source: Oxford University Press journal article supplement (doi:10.1242/dev.199928), 2022-01-10
Supplement: dev199928supp.pdf [file dev199928supp.pdf]

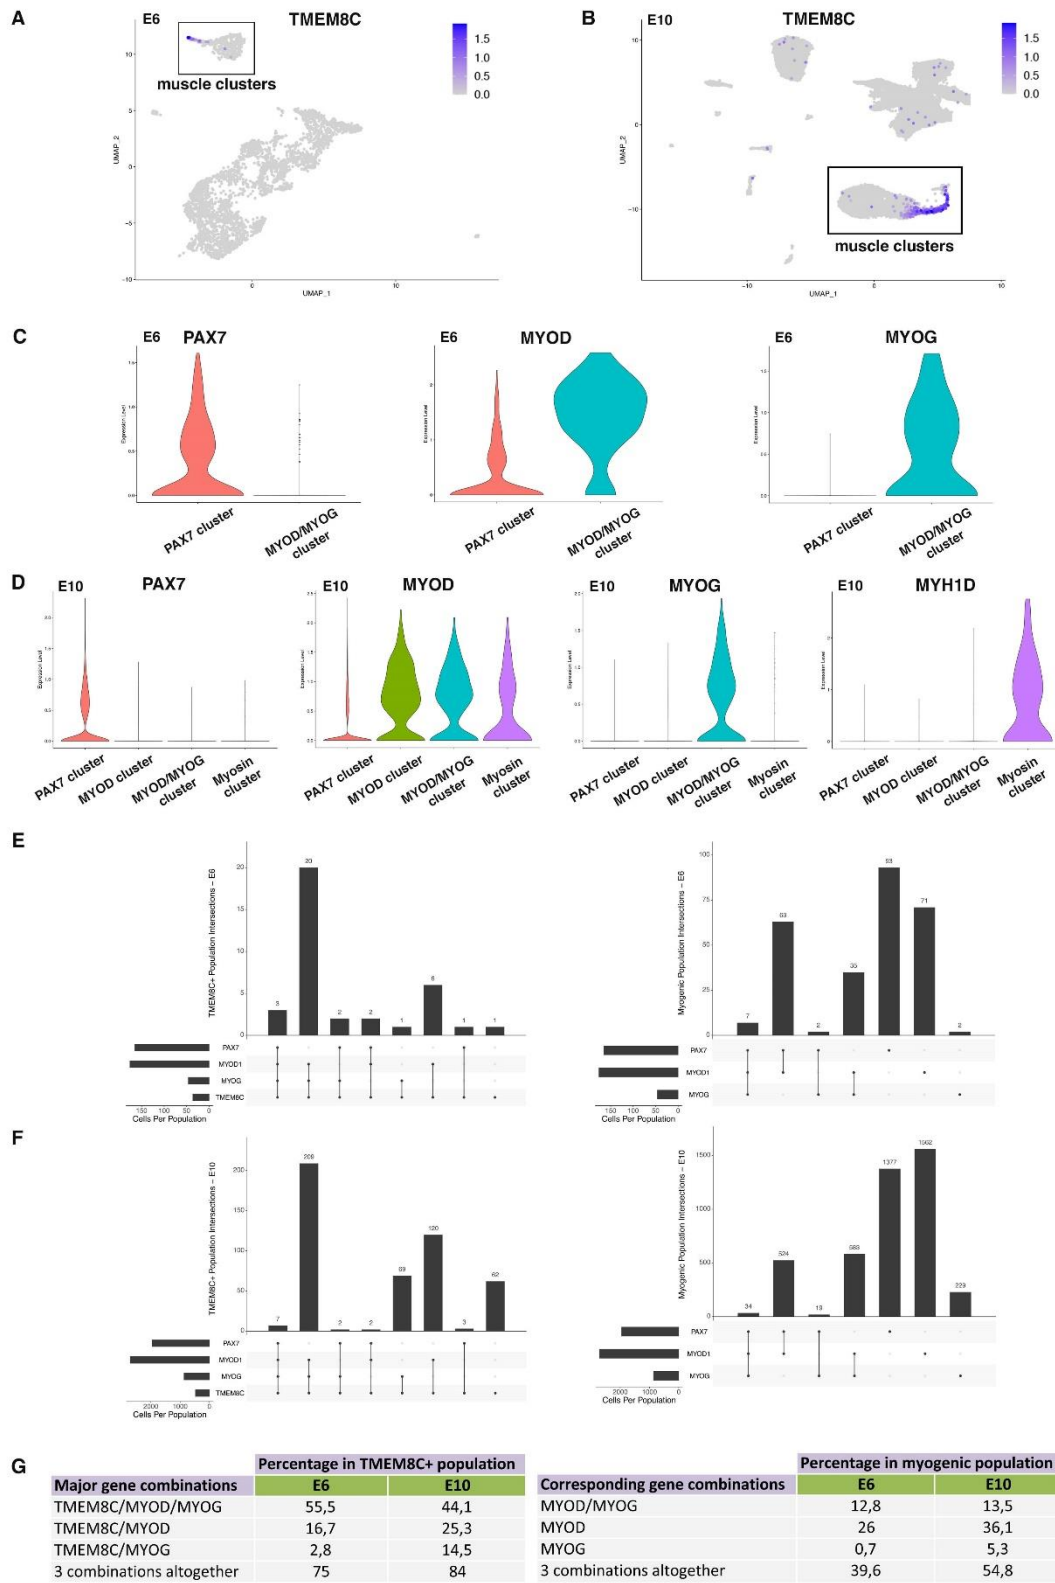

Figure S1

**Fig. S1. *TMEM8C* is co-expressed with *MYOD* and *MYOG* in limb foetal muscles**

(A,B) Feature plots showing the distribution of *TMEM8C*<sup>+</sup> cells across all limb clusters at E6 (A) and E10 (B). The muscle clusters are boxed. (C) Violin plots showing Log-normalized expression levels of the *PAX7*, *MYOD* and *MYOG* genes in cells grouped by muscle clusters at E6. (D) Violin plots showing Log-normalized expression levels of the *PAX7*, *MYOD*, *MYOG* and *MYH10* genes in cells grouped by muscle clusters at E10. (E,F) UpSet plots showing cell numbers for the gene combinations present within the *TMEM8C*<sup>+</sup> population (left panel) or within the myogenic (*PAX7*<sup>+</sup>, *MYOD*<sup>+</sup> or *MYOG*<sup>+</sup>) population (right panel) at E6 (E) and E10 (F). The genes considered for the combinations are *PAX7*, *MYOD* and *MYOG*. The size of each population expressing a gene of interest is shown at the bottom left of the plot. (G) Left panel: percentage of gene combinations among the *TMEM8C*<sup>+</sup> cell population at E6 and E10. Right panel: percentage of gene combinations among the myogenic (*PAX7*<sup>+</sup>, *MYOD*<sup>+</sup> or *MYOG*<sup>+</sup>) population at E6 and E10. Numbers used for percentage calculations are those of panels E and F.

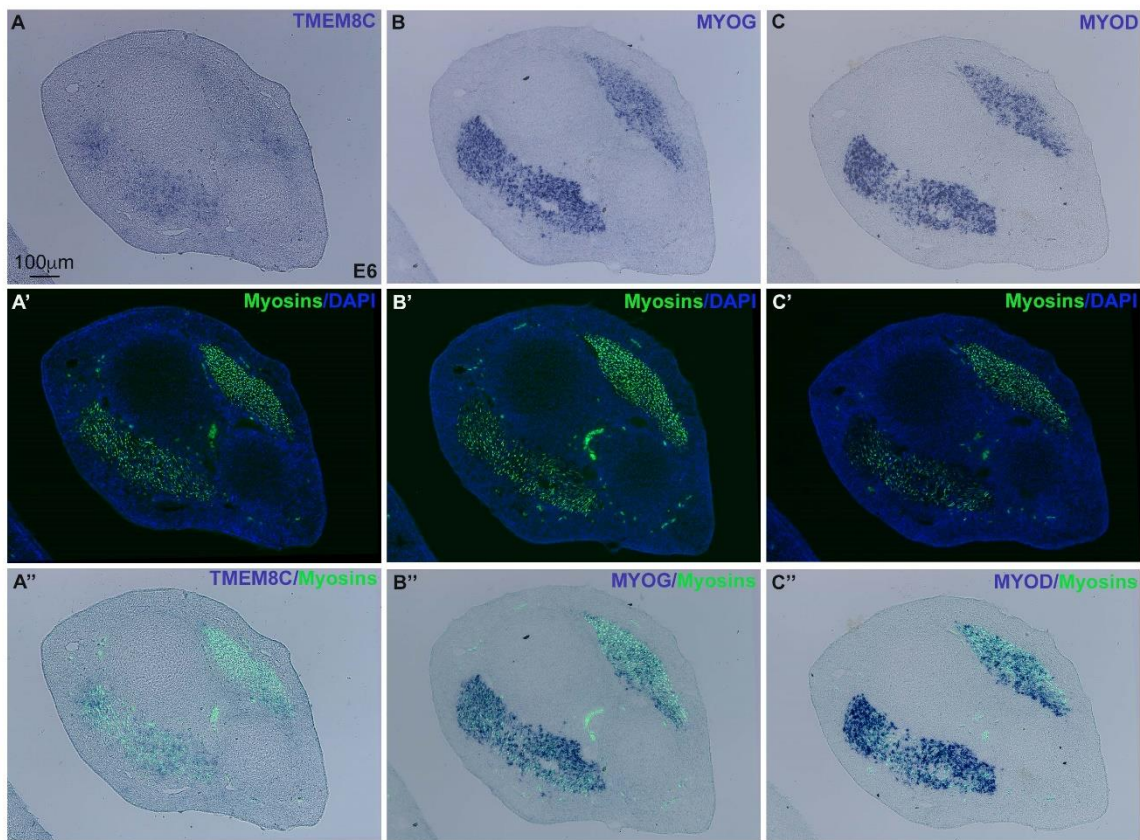

Figure S2

**Fig. S2. *MYOD*, *MYOG* and *TMEM8C* transcripts show a uniform distribution in limb muscle masses of E6 chicken embryos**

In situ hybridization to adjacent limb sections of E6 chicken embryos with the *TMEM8C* (A,A',A''), *MYOG* (B,B',B'') and *MYOD* (C,C',C'') probes (blue), followed by immunohistochemistry with the MF20 antibody to visualize myosins (green) and the nuclear marker DAPI (n=4 embryos). (A-C) show in situ hybridization, (A'-C') show myosin expression, (A''-C'') show combined in situ hybridization and myosin expression.

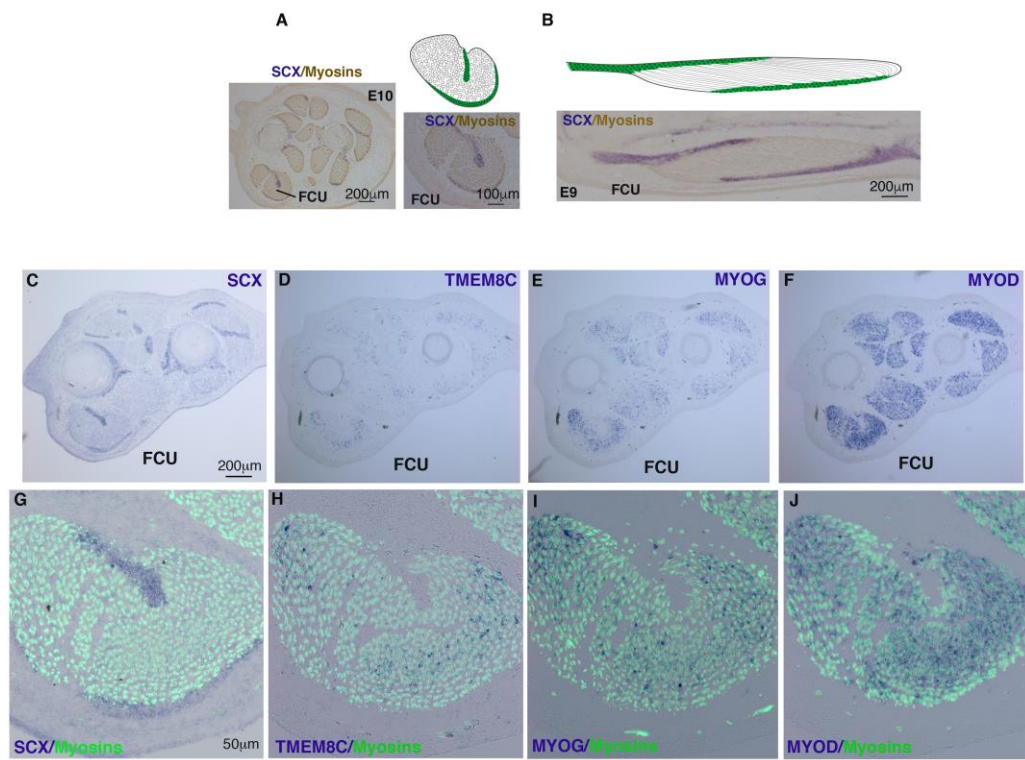

Figure S3

**Fig. S3. *TMEM8C* and *MYOG* transcripts are regionalized in foetal muscles of E10 chicken limbs**

(A,B) Schematic representation of FCU muscle and adjacent tendons. Transverse (A) and longitudinal (B) views to visualise the muscle and tendon interface. (A,B) Tendon are in green in the schematics; In situ hybridization to transverse (A) and longitudinal (B) sections of the FCU muscle with SCX probe (blue) followed by immunohistochemistry with the MF20 antibody to visualize myosins (brown). (C-J) In situ hybridization to adjacent and transverse limb sections of E10 chicken embryos with the SCX (C,G), *TMEM8C* (D,H), *MYOG* (E,I) and *MYOD* (F,J) probes (blue), followed by immunohistochemistry with the MF20 antibody to visualize myosins (green) (n=5 embryos). (G-J) are high magnification of the FCU muscle shown in (C,F). *TMEM8C* and *MYOG* transcripts display a regionalized expression in muscles with less intense expression close to SCX+ tendons.

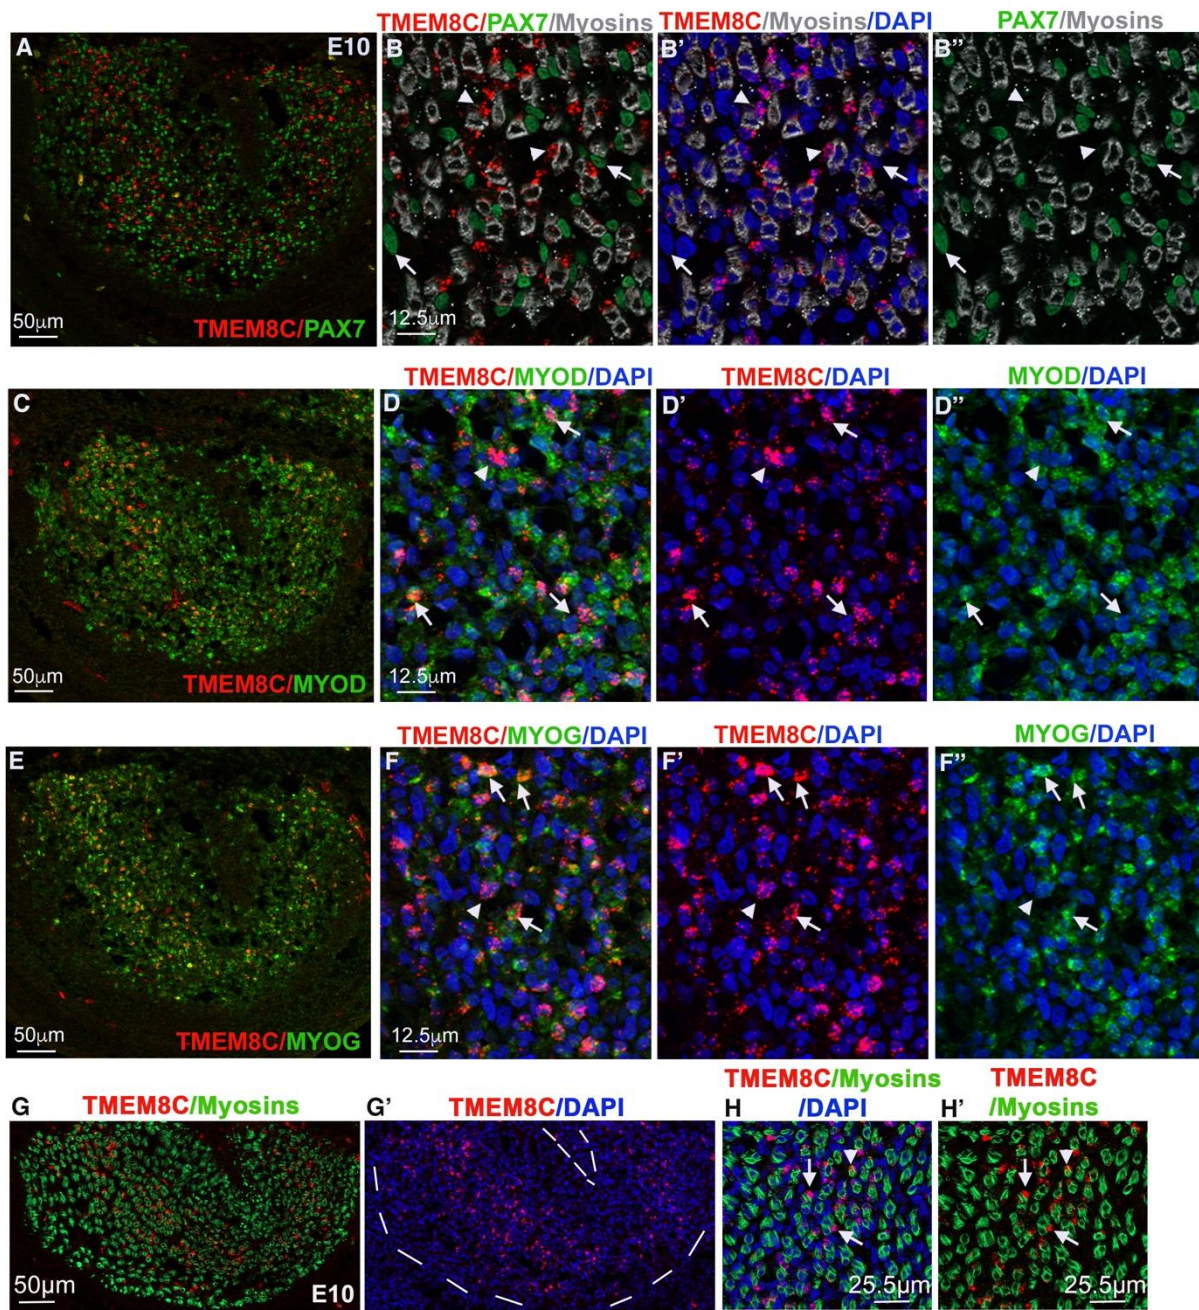

Figure S4

**Fig. S4. *TMEM8C* is preferentially expressed in *MYOG*<sup>+</sup> cells outside myosin<sup>+</sup> myotubes and excluded from *PAX7*<sup>+</sup> progenitors.**

(A,B,B',B'') Fluorescent RNA in situ hybridization to transverse limb muscle sections of E10 chicken embryos with the *TMEM8C* probe (red), followed by immunohistochemistry with the *PAX7* antibody (green) and MF20 antibody to visualize myosins (grey). (B,B',B'') are high magnification of the FCU muscle shown in (A). Arrowheads point to *TMEM8C* expressing cells (red), while arrows point to *PAX7*<sup>+</sup> cells (green). (C,D,D',D'') Double in situ hybridisation to transverse limb muscle section at E10 with *TMEM8C* (red) and *MYOD* (green) probes. (D,D',D'') are high magnification of the FCU muscle shown in (C). Arrows point to *TMEM8C*<sup>+</sup>*MYOD*<sup>+</sup> cells (red and green), while arrowheads point to *TMEM8C*<sup>+</sup>*MYOD*<sup>-</sup> cells (red). (E,F,F',F'') Double in situ hybridisation to transverse limb muscle section at E10 with *TMEM8C* (red) and *MYOG* (green) probes. (F,F',F'') are high magnification of the FCU muscle shown in (E). Arrows point to *TMEM8C*<sup>+</sup>*MYOG*<sup>+</sup> cells (red and green), while arrowheads point to *TMEM8C*<sup>+</sup> cells (red) that are not *MYOG*<sup>+</sup> cells. (G,G',H,H') Fluorescent in situ hybridization to transverse limb muscle sections of E10 chicken embryos with the *TMEM8C* probe (red), followed by immunohistochemistry with the MF20 antibody to visualize myosins (green). (H,H') is a higher magnification of (G). *TMEM8C* transcripts (red, arrows) are preferentially observed outside myotubes (green), although we could detect rare myotube expressing *TMEM8C*, n=5 embryos.

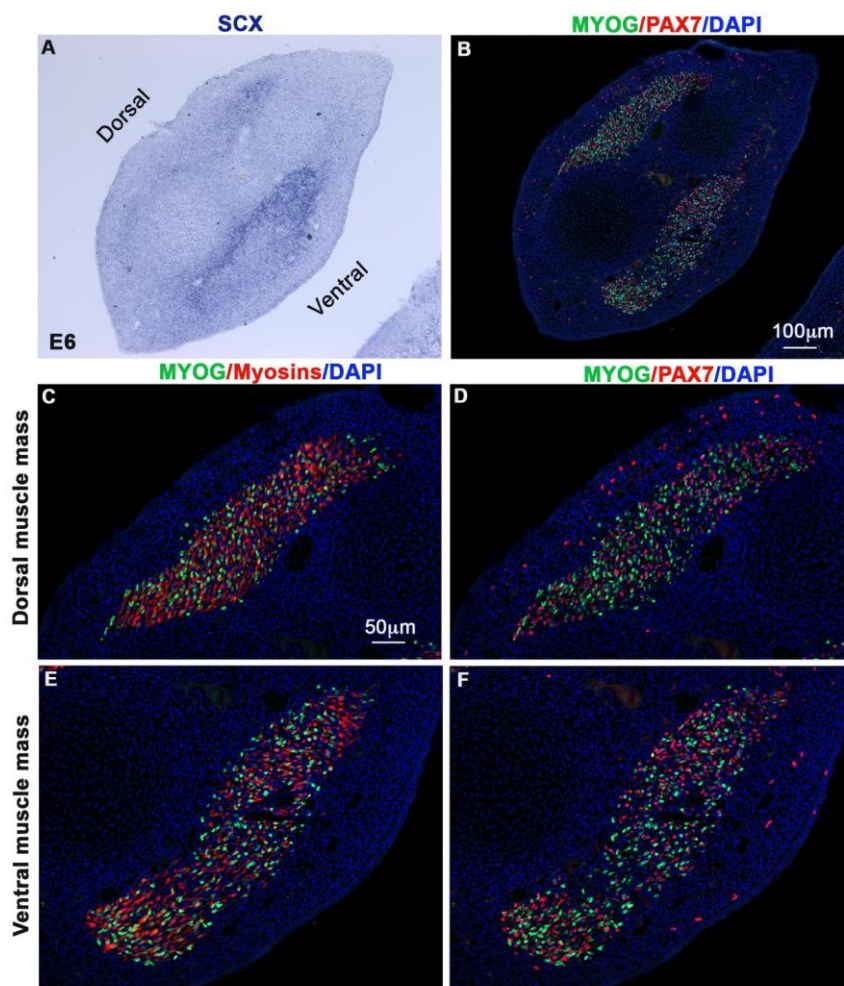

Figure S5

**Fig. S5. MYOG + cells are not regionalized in limb muscle masses of E6 chicken embryos**

(A,B) Adjacent limb transverse sections of E6 chicken embryos were hybridized with the SCX probe (A) and co-immunostained with MYOG (green) and PAX7 (red) antibodies, and DAPI to visualise nuclei (n=3 embryos). (C-F) Adjacent limb transverse sections of E6 chicken embryos were co-immunostained with MYOG (green) and MF20 (red), to visualise myosins, (C,E) and MYOG (green) and PAX7 (red) (D,F), with DAPI to visualise nuclei (C-F). (D, F) are high-magnifications of B. (C,D) and (D,F) show dorsal and ventral muscle masses, respectively.

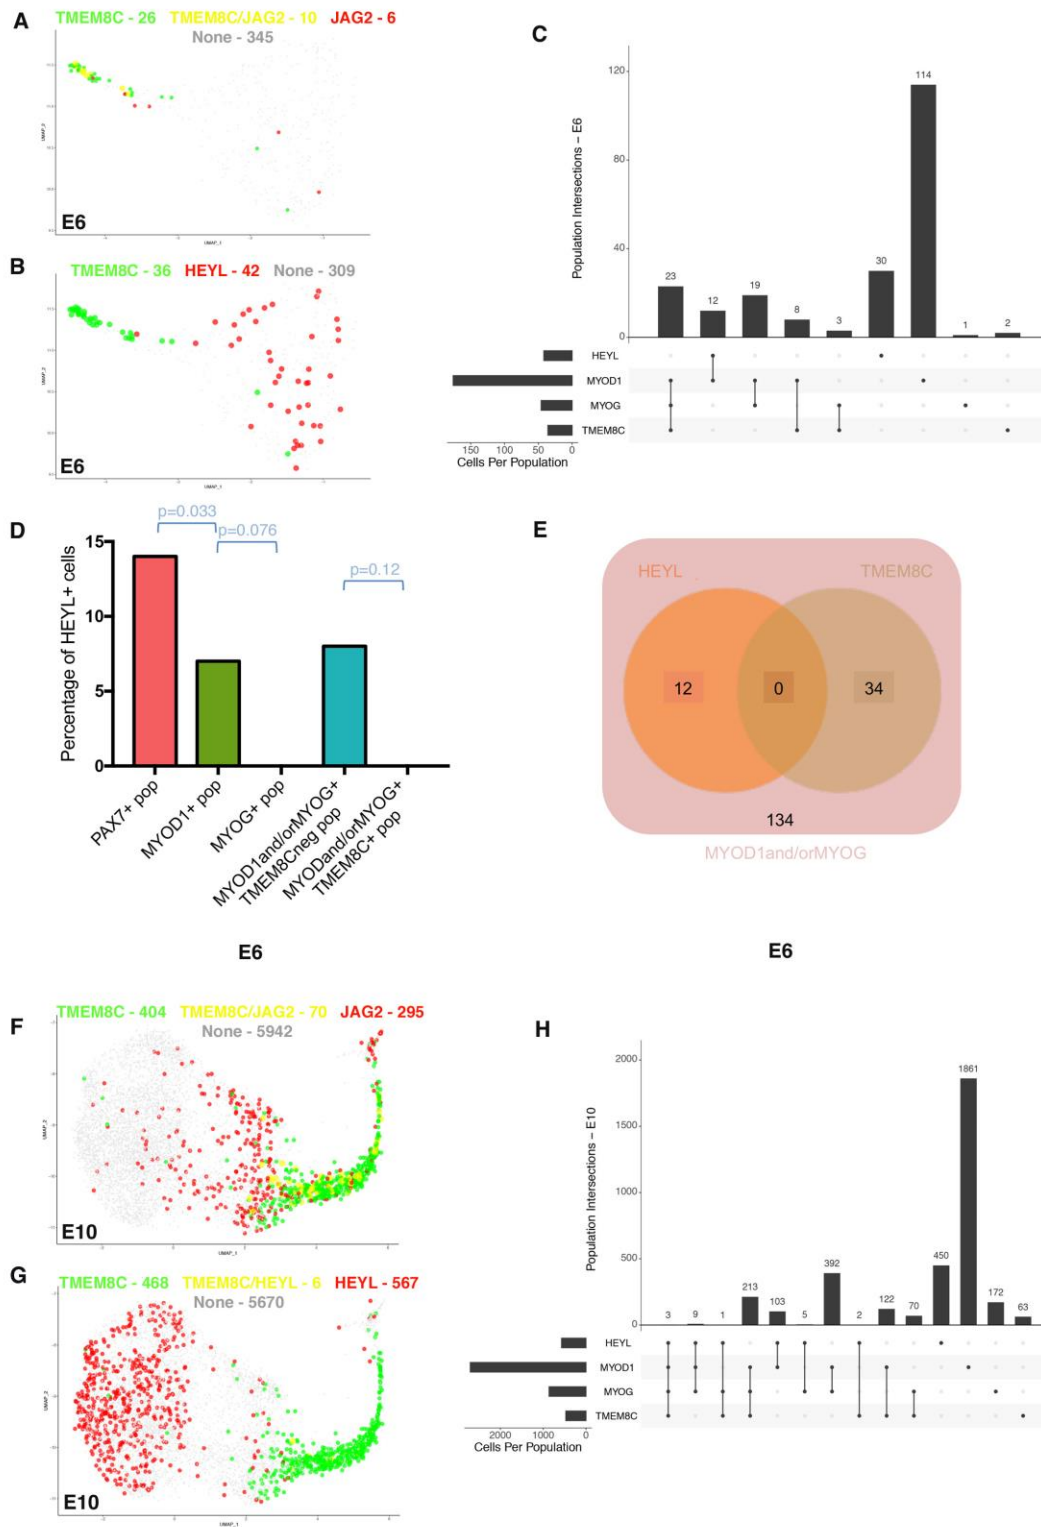

Figure S6



**Fig. S6. Unlike *JAG2*, *HEYL* expression does not overlap with *TMEM8C* expression at E6 and E10.**

(**A,F**) Feature plot showing the distribution of *TMEM8C*<sup>+</sup> cells (green dots) and *JAG2*<sup>+</sup> cells (red dots) and double *TMEM8C*<sup>+</sup>/*JAG2*<sup>+</sup> cells (yellow dots) within muscle clusters at E6 (A) and E10 (F). (**B,G**) Feature plot showing the distribution of *TMEM8C*<sup>+</sup> cells (green dots) and *HEYL*<sup>+</sup> cells (red dots) and double *TMEM8C*<sup>+</sup>/*HEYL*<sup>+</sup> cells (yellow dots) within muscle clusters at E6 (B) and E10 (G). (**C,H**) UpSet plots showing cell numbers for the gene combinations present within the *MYOD1*<sup>+</sup> and/or *MYOG*<sup>+</sup> population at E6 (C) and E10 (H). The genes considered for the combinations are *HEYL*, *MYOD1*, *MYOG* and *TMEM8C*. The size of each population expressing a gene of interest is shown at the bottom left of the plot. (**D**) Bar plot showing the percentage of *HEYL*<sup>+</sup> cells within the *PAX7*<sup>+</sup> (red), *MYOD1*<sup>+</sup> (green), *MYOG*<sup>+</sup> (blue) populations as well as within the *MYOD1*<sup>+</sup> and/or *MYOG*<sup>+</sup>/*TMEM8C*<sup>neg</sup> and *TMEM8C*<sup>+</sup> (blue) populations at E6. Statistical test used is two-sided Fisher's exact test. Sample size: 3268 cells from three E6 embryos. The exact p values are indicated on the graph. Numbers used for percentage calculations in the *PAX7*<sup>+</sup>, *MYOD1*<sup>+</sup> and *MYOG*<sup>+</sup> populations are those of the corresponding co-expression feature plots (data not shown). Numbers used for percentage calculations in the two *MYOD1*<sup>+</sup> and/or *MYOG*<sup>+</sup> populations are those of panel C. (**E**) Visual representation in the form of a Venn diagram showing the distribution of *HEYL*<sup>+</sup> and *TMEM8C*<sup>+</sup> cells within the *MYOD1*<sup>+</sup> and/or *MYOG*<sup>+</sup> population at E6.

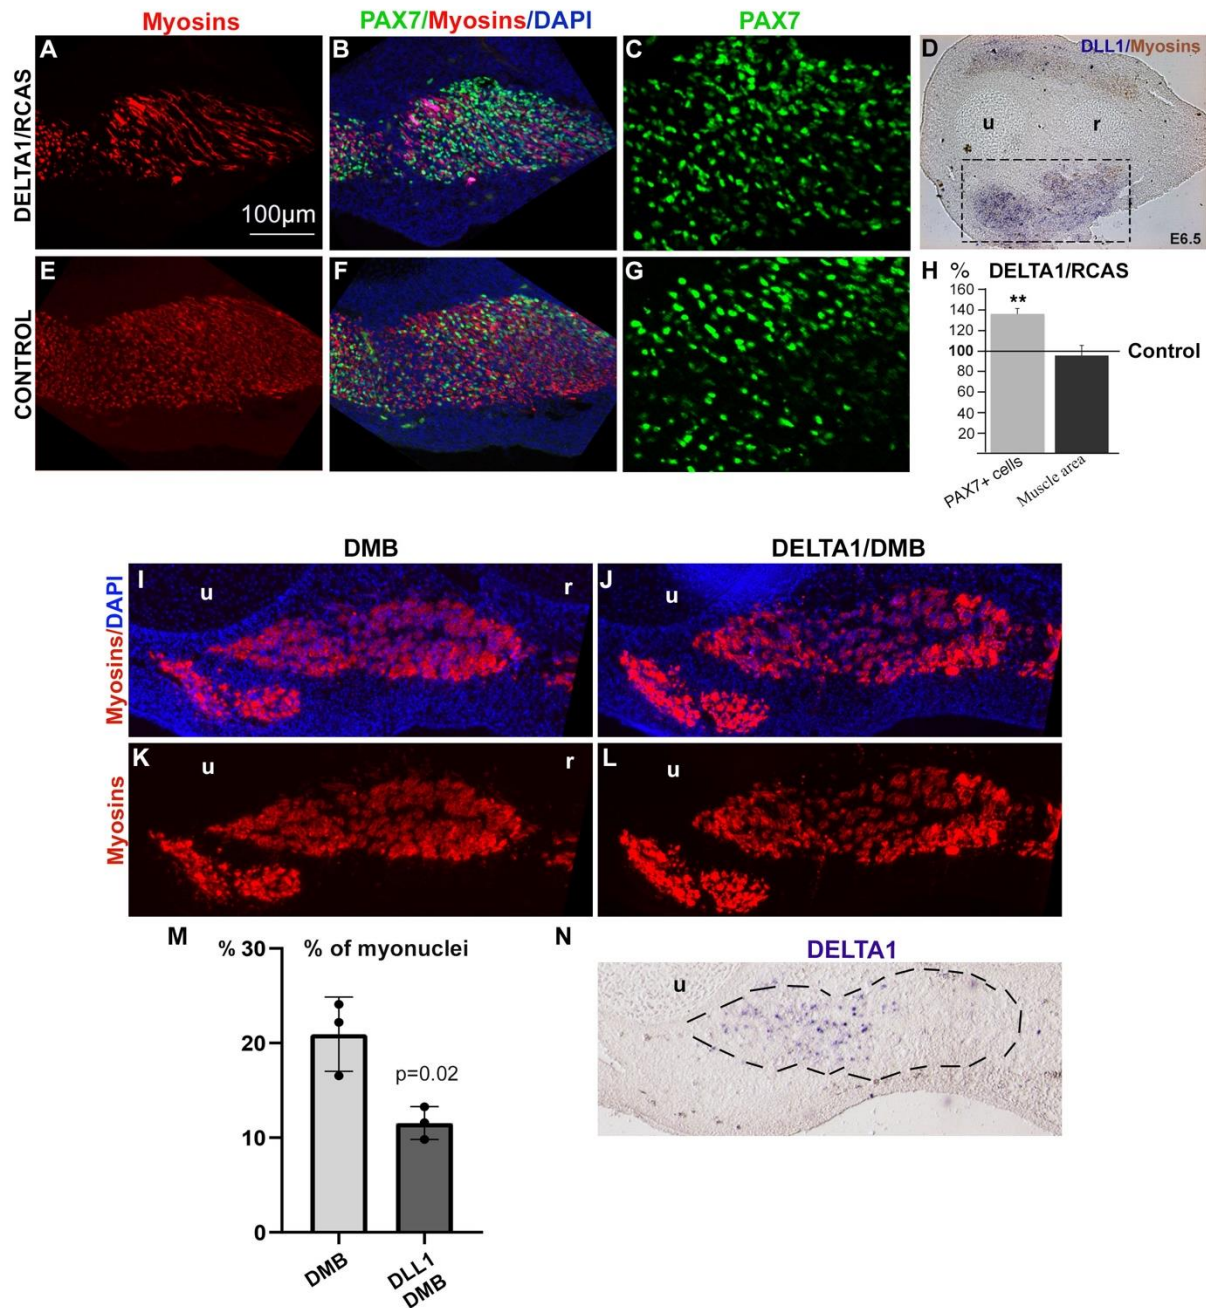

Figure S7

**Fig. S7. DELTA1 activated NOTCH prevents the increase of myoblast fusion observed in DMB limbs**

(A-G) DELTA1/RCAS-expressing cells were grafted into the presumptive right forelimb buds of E4.5 chicken embryos, the contralateral limb of the same embryo was used as control (n=3 embryos). DELTA1-grafted right (A-D) and control left (E-G) forelimbs from E6.5

chicken embryos were cut transversely and analysed for *DLL1* transcripts (D) and immunostained with the PAX7 (green) and MF20 (myosins, red) antibodies (A-C,E-G). (H) Percentage of PAX7+ cells with respect to the muscle area and percentage of the muscle area (MF20 area), in muscle regions of DELTA1-grafted and control forelimbs from E6.5 chicken embryos (n=3 embryos). (I-L) Limb transverse sections of E9.5 DMB-treated embryos (I,J) and DELTA1-grafted embryos treated with DMB (K,L) immunostained with MF20 to visualise myosins (red) and DAPI (blue) to visualise the nuclei. (M) Quantification of the number of myonuclei in MF20+ myotubes versus total DAPI. Graph shows the percentage of cells per area  $\pm$  s.d. (n=3 embryos). (N) In situ hybridization for *DLL1* (blue) shows ectopic expression of *DLL1* in DELTA1-grafted embryos treated with DMB. (N) is an adjacent section to (J,L) of the same embryo.

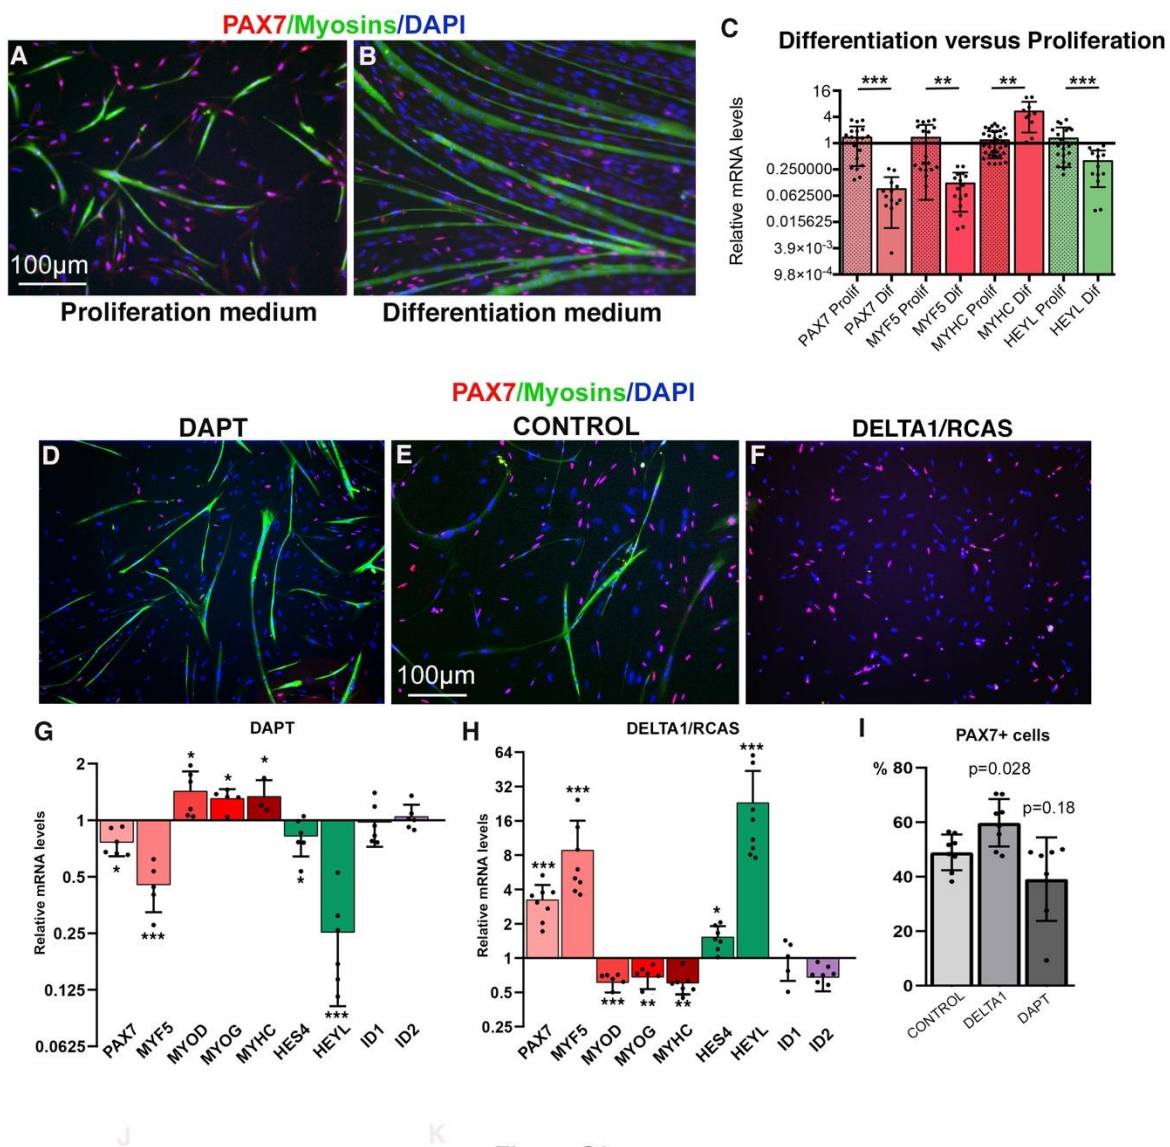

**Fig. S8. A myoblast culture system that mimics in vivo myogenesis**

(A,B) Representative fields of proliferating (A) and differentiating (B) chicken myoblasts labelled with PAX7 (red) and MF20 (green), to visualise myosins, and with the nuclear marker DAPI (n=12 independent cultures). (C) RT-qPCR analyses of the mRNA expression levels for the muscle markers, *PAX7*, *MYF5*, *MYHC* and the NOTCH target gene *HEYL*, in differentiation (*PAX7* n=12, *MYF5* n=15, *MYHC* n=9, *HEYL* n=12) versus proliferation (*PAX7* n=18, *MYF5* n=17, *MYHC* n=35, *HEYL* n=20) culture conditions. The mRNA levels

of the genes of myoblasts in proliferation conditions were normalised to 1 (control) and the relative mRNA levels of the genes in differentiation conditions was calculated versus the expression in proliferating conditions. Graph shows mean $\pm$ s.d. **(D-F)** Representative fields showing PAX7+ (red) and myosin+ (green) cells in chicken foetal myoblasts treated with DAPT (D), transfected with Empty/RCAS (E) or transfected with DELTA1/RCAS (F), and cultured in proliferation conditions (n=5 independent cultures). **(G,H)** RT-qPCR analyses of the expression levels for muscle markers, NOTCH target genes and BMP target genes in DAPT-treated (G) (*PAX7* n=6, *MYF5* n=5, *MYOD* n=6, *MYOG* n=5, *MYHC* n=3, *HES4* n=6, *HEYL* n=6, *ID1* n=6, *ID2* n=6) and DELTA1/RCAS-infected (H) (*PAX7* n=8, *MYF5* n=8, *MYOD* n=6, *MYOG* n=6, *MYHC* n=7, *HES4* n=7, *HEYL* n=8, *ID1* n=5, *ID2* n=7) myoblasts cultured in proliferation conditions. The relative mRNA levels were calculated using the  $2^{-\Delta\Delta C_t}$  method. For each gene, the mRNA levels of Empty/RCAS-infected myoblasts (control) were normalised to 1. Graph shows mean $\pm$ s.d. \*p<0.05; \*\* p<0.01; \*\*\* p<0.001. **(I)** Percentage of PAX7+ cells with respect to all DAPI+ cells in control, DAPT-treated and DELTA1 cultures (control n=8, DELTA1 n=8, DAPT n=7).

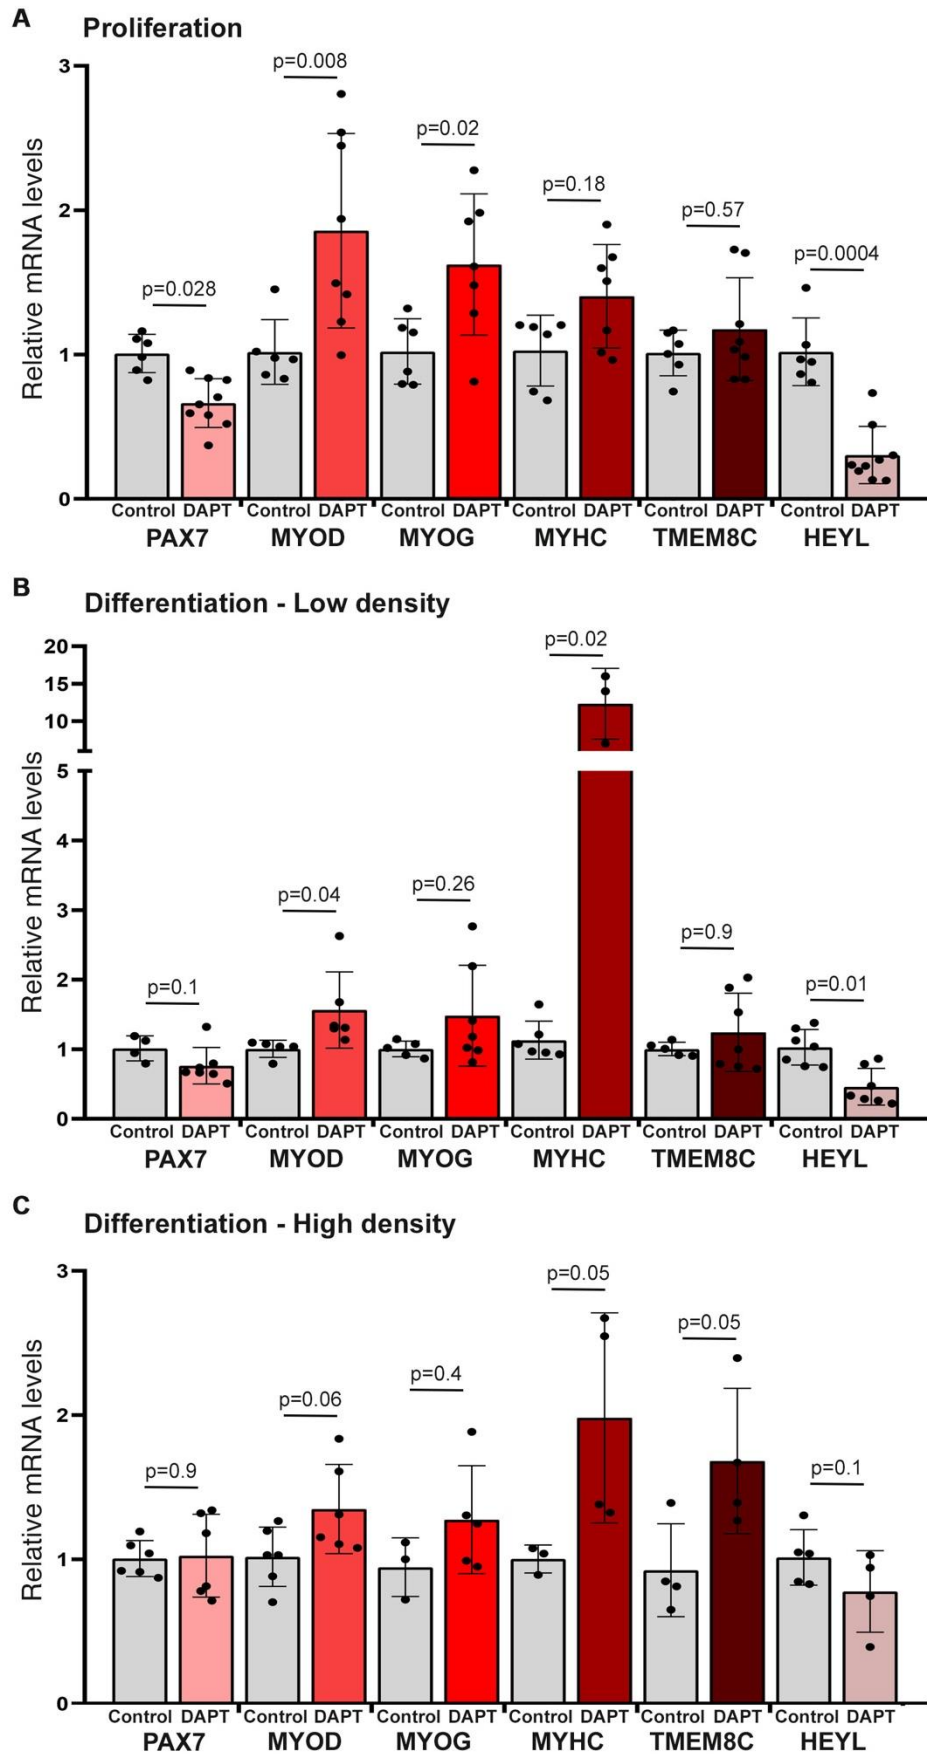

Figure S9

**Fig. S9. Inhibition of NOTCH increases *TMEM8C* expression in the differentiation and high confluence condition in the 2-step culture system.**

(A) Myoblasts cultured at low density with proliferation medium. RT-qPCR analyses of the expression levels for muscle markers and *HEYL* (NOTCH target gene) in control myoblasts (*PAX7* n=6, *MYOD* n=6, *MYOG* n=6, *MYHC* n=6, *TMEM8C* n=6, *HEYL* n=6) and DAPT-treated myoblasts (*PAX7* n=9, *MYOD* n=8, *MYOG* n=7, *MYHC* n=7, *TMEM8C* n=8, *HEYL* n=9) cultured at low density and in proliferation conditions. (B) Myoblasts cultured at low density with differentiation medium. RT-qPCR analyses of the expression levels for muscle markers and *HEYL* (NOTCH target gene) in control myoblasts (*PAX7* n=4, *MYOD* n=5, *MYOG* n=5, *MYHC* n=6, *TMEM8C* n=5, *HEYL* n=7) and DAPT-treated myoblasts (*PAX7* n=7, *MYOD* n=6, *MYOG* n=6, *MYHC* n=3, *TMEM8C* n=7, *HEYL* n=7) cultured at low density and in differentiation conditions. (C) Myoblasts cultured at high density with differentiation medium. RT-qPCR analyses of the expression levels for muscle markers and *HEYL* (NOTCH target gene) in control myoblasts (*PAX7* n=6, *MYOD* n=6, *MYOG* n=3, *MYHC* n=3, *TMEM8C* n=4, *HEYL* n=5) and DAPT-treated myoblasts (*PAX7* n=6, *MYOD* n=6, *MYOG* n=5, *MYHC* n=4, *TMEM8C* n=4, *HEYL* n=4) cultured at high density and in differentiation conditions. The relative mRNA levels were calculated using the  $2^{-\Delta\Delta Ct}$  method. For each gene, the mRNA levels of control myoblasts were normalised to 1. Graph shows mean $\pm$ s.d. p values are indicated on the graphs.

**Table S1.** List of antibodies.

| Antibody                                 | Validation                                                                                                                                                                                                                    | Source              | Reference             | Dilution       |
|------------------------------------------|-------------------------------------------------------------------------------------------------------------------------------------------------------------------------------------------------------------------------------|---------------------|-----------------------|----------------|
| Mouse monoclonal IgG2b anti-MYHC         | <a href="https://dshb.biology.uiowa.edu/MF-20">https://dshb.biology.uiowa.edu/MF-20</a>                                                                                                                                       | DSHB                | MF20                  | IF supernatant |
| Mouse monoclonal IgG1 anti-PAX7          | <a href="https://dshb.biology.uiowa.edu/PAX7">https://dshb.biology.uiowa.edu/PAX7</a>                                                                                                                                         | DSHB                | PAX7, lot 20ea1/24/19 | IF (1:200)     |
| Mouse polyclonal anti-MYOD               | Manceau et al., 2008                                                                                                                                                                                                          | produced in the lab | 554130, lot 9011506   | IF (1:100)     |
| Rabbit polyclonal anti-MYOG              | Manceau et al., 2008                                                                                                                                                                                                          | produced in the lab | lot HL1510            | IF supernatant |
| Rabbit polyclonal anti-Collagen type XII | Koch et al, 1992                                                                                                                                                                                                              | produced in the lab | Clone 522             | IF (1:100)     |
| Rabbit polyclonal anti-pSMAD1/5/9        | <a href="https://www.cellsignal.com/products/primary-antibodies/phospho-smad1-5-ser463-465-41d10-rabbit-mab/9516">https://www.cellsignal.com/products/primary-antibodies/phospho-smad1-5-ser463-465-41d10-rabbit-mab/9516</a> | Cell Signalling     | 9516, lot 9           | IF (1:100)     |
| Rabbit polyclonal anti-HEYL              | Fukada et al., 2007                                                                                                                                                                                                           | produced in the lab | NM_013905             | ChIP (5µg/IP)  |

**Table S2.** List of primers.

| RT-qPCR       | Forward                        | Reverse                         |
|---------------|--------------------------------|---------------------------------|
| <i>PAX7</i>   | 5'-AGAAGAAGGCCAAGCACAGCATAG-3' | 5'- ATTCGACATCGGAGCCTTCATCCA-3' |
| <i>MYF5</i>   | 5'-ACCAGAGACTCCCCAAAGTG-3'     | 5'-TCGATGTACCTGATGGCGTT-3'      |
| <i>MYOD</i>   | 5'-CGACAGCAGCTACTACACGGAAT-3'  | 5'-CTCTCCCATGCTTTGGGTC-3'       |
| <i>MYOG</i>   | 5'-AGGCTGAAGAAGGTGAACGAAG-3'   | 5'-CAGAGTGCTGCGTTTCAGAGC-3'     |
| <i>MYHC</i>   | 5'-TGACAACCTCCTCACGCTTTG-3'    | 5'- CTCTGGCTTCTTGTTGGA-3'       |
| <i>TMEM8C</i> | 5'-TGGGTGTCCCTGATGGC-3'        | 5'-CCCGATGGGTCCTGAGTAG-3'       |
| <i>HEYL</i>   | 5'-CCAAGCTGGAGAAGGCAGA-3'      | 5'-CCAGAGCACGAGCATCCA-3'        |
| <i>HES4</i>   | 5'-GCCGGACAAACCTCGGA-3'        | 5'-CATCCGCTGCCATTTACCTT-3'      |
| <i>ID1</i>    | 5'-CCGGAGGGTCTCTAAAGTGG-3'     | 5'-GCAGGTCCCAGATGTAGTCG-3'      |
| <i>ID2</i>    | 5'-GAAGAACGGCCTTTCCGAG-3'      | 5'-TCATGTTGTACAGCAGGCTCA-3'     |
| ChIP RT-qPCR  | Forward                        | Reverse                         |
| R1            | 5'-GTGCATCACAGCCAGCATG-3'      | 5'-GGTGGGCAGGAGGAGTTT-3'        |
| R2            | 5'-CACAGTTGCACGTCCATGC-3'      | 5'-CAACCTGAATGATTCTGTGGTTCTG-3' |
| R3            | 5'-GCTGCAAATCAAGCACCGG-3'      | 5'-CAAACCGTTGTCACACAACCC-3'     |
